# Supplementary material for: Residual Risk of Atherosclerotic Cardiovascular Events in Relation to Reductions in Very‐Low‐Density Lipoproteins
Source: PubMed Central journal article supplement — J Am Heart Assoc. 2017 Dec 9;6(12):e007402. doi: 10.1161/JAHA.117.007402 (PMC5779048; doi:10.1161/jaha.117.007402), 2017-12-09
Supplement: JAH3-6-e007402-s001.pdf [file JAH3-6-e007402-s001.pdf]

# **Supplemental Material**

**Table S1.** Adjusted\* HR (95% CI) for the primary CVD endpoint among those achieving an absolute reduction greater than or less than the median on rosuvastatin 20 mg daily relative to placebo (reference), examining event rates after 1 year among those confirmed to be on-statin (N= 8,420; 130 events) compared with the overall cohort.

| Marker               | Regression Model        | HR (95% CI) |                                      |                                      | P-value** |
|----------------------|-------------------------|-------------|--------------------------------------|--------------------------------------|-----------|
|                      |                         | Placebo     | Rosuvastatin                         |                                      |           |
|                      |                         |             | Minimal Response<br>(<median abs. Δ) | Larger Response<br>(≥ median abs. Δ) |           |
| <b>LDL-c</b>         | Confirmed on study drug | ref.        | 0.69 (0.43, 1.12)                    | 0.59 (0.38, 0.93)                    | 0.62      |
|                      | Overall                 | ref.        | 0.74 (0.52, 1.06)                    | 0.54 (0.36, 0.79)                    | 0.17      |
| <b>Triglycerides</b> | Confirmed on study drug | ref.        | 0.50 (0.29, 0.85)                    | 0.75 (0.49, 1.16)                    | 0.19      |
|                      | Overall                 | ref.        | 0.54 (0.37, 0.80)                    | 0.72 (0.51, 1.03)                    | 0.24      |
| <b>Calculated RC</b> | Confirmed on study drug | ref.        | 0.50 (0.30, 0.85)                    | 0.75 (0.49, 1.15)                    | 0.20      |
|                      | Overall                 | ref.        | 0.56 (0.38, 0.83)                    | 0.71 (0.50, 1.00)                    | 0.35      |
| <b>VLDL-c</b>        | Confirmed on study drug | ref.        | 0.78 (0.49, 1.23)                    | 0.52 (0.32, 0.85)                    | 0.20      |
|                      | Overall                 | ref.        | 0.86 (0.61, 1.21)                    | 0.44 (0.30, 0.67)                    | 0.01      |
| <b>Large VLDL-p</b>  | Confirmed on study drug | ref.        | 0.73 (0.39, 1.38)                    | 0.73 (0.38, 1.39)                    | 0.98      |
|                      | Overall                 | ref.        | 0.47 (0.29, 0.75)                    | 0.45 (0.27, 0.73)                    | 0.85      |
| <b>Medium VLDL-p</b> | Confirmed on study drug | ref.        | 0.60 (0.38, 0.97)                    | 0.66 (0.42, 1.05)                    | 0.76      |
|                      | Overall                 | ref.        | 0.59 (0.40, 0.86)                    | 0.68 (0.47, 0.97)                    | 0.56      |
| <b>Small VLDL-p</b>  | Confirmed on study drug | ref.        | 0.79 (0.50, 1.25)                    | 0.51 (0.31, 0.83)                    | 0.16      |
|                      | Overall                 | ref.        | 0.86 (0.61, 1.21)                    | 0.46 (0.31, 0.68)                    | 0.01      |

**Abbreviations:** CI = confidence interval; HR = hazard ratio; RC = remnant cholesterol; VLDL=very low-density cholesterol.

\*Adjusted model is adjusted for age, sex, race, smoking, baseline BMI, baseline systolic BP, baseline fasting glucose, baseline HDLc, the natural log of baseline hsCRP, and baseline marker level. \*\*For comparison of hazard ratio between the two rosuvastatin groups.

\*\*P for comparison of Minimal versus Larger response groups.
